# Supplementary material for: Structural modulation of phenothiazine and coumarin based derivatives for high performance dye sensitized solar cells: a theoretical study
Source: Royal Society of Chemistry journal article supplement (doi:10.1039/d1cp00036e), 2021-01-01
Supplement: d1cp00036e1.pdf [file d1cp00036e1.pdf]

### Supporting Information

## **Structural Modulation of Phenothiazine and Coumarin Based Derivatives for High Performance Dye Sensitized Solar Cells**

Shahnaz Ahmed, Smiti Rani Bora, Tridip Chutia and Dhruva Jyoti Kalita\*  
Department of Chemistry, Gauhati University, Guwahati-781014, India  
E-mail: [dhruvajyoti.kalita@gauhati.ac.in](mailto:dhruvajyoti.kalita@gauhati.ac.in)

Table S1. Coordinates of the studied compounds studied at B3LYP/6-31G(d,p) level of theory in angstrom unit.

#### 1. COU-BTZ

|   |             |             |             |
|---|-------------|-------------|-------------|
| C | -9.34634300 | 2.68927300  | -0.33734300 |
| C | -7.41650900 | 1.13032900  | 0.03278900  |
| C | -6.52462500 | 2.25534500  | 0.08793400  |
| C | -7.09666700 | 3.65308600  | 0.09827100  |
| C | -8.32264800 | 3.71335400  | -0.81308900 |
| C | -6.90277600 | -0.20062300 | 0.11200100  |
| C | -5.16567500 | 2.04781500  | 0.10356100  |
| C | -4.61269800 | 0.75189200  | 0.07913600  |
| C | -5.51000300 | -0.33753100 | 0.07922200  |
| C | -3.63885700 | -1.92232900 | 0.00078000  |
| C | -2.70297000 | -0.79081200 | 0.01838500  |
| C | -3.22161500 | 0.48415400  | 0.05528400  |
| H | -9.83433900 | 3.04660400  | 0.58368900  |
| H | -6.33323100 | 4.37233700  | -0.21733700 |
| H | -8.02570300 | 3.49375800  | -1.84598200 |
| H | -4.49406500 | 2.90317700  | 0.12504500  |
| H | -2.51510200 | 1.31015300  | 0.06549300  |
| N | -8.76782000 | 1.36468700  | -0.09468100 |
| O | -4.99706600 | -1.60455500 | 0.02736700  |
| C | -9.71563800 | 0.26342100  | -0.19371100 |
| C | -7.83679600 | -1.42316400 | 0.20481800  |
| C | -9.24165900 | -0.93014300 | 0.61358400  |
| C | -7.40522400 | -2.42457500 | 1.30555500  |
| C | -7.90043200 | -2.15929700 | -1.15409300 |
| H | -8.21158600 | -3.15199700 | 1.46204200  |
| H | -6.50156800 | -2.97287400 | 1.04271900  |
| H | -7.23248600 | -1.90858900 | 2.25722700  |
| H | -8.57690700 | -3.02091000 | -1.08649500 |
| H | -8.26059500 | -1.50630500 | -1.95688400 |
| H | -6.91163900 | -2.52762800 | -1.44027100 |
| O | -3.36718500 | -3.10480300 | -0.03691200 |
| N | -1.32529000 | -0.91858600 | -0.00080600 |
| C | -0.69986300 | -2.05063700 | -0.05108200 |
| H | -1.20957900 | -3.01476200 | -0.08450200 |
| C | 0.74158500  | -2.07935300 | -0.06547300 |
| C | 1.54493700  | -3.20883500 | -0.12391700 |

|   |              |             |             |
|---|--------------|-------------|-------------|
| S | 1.69558600   | -0.62123900 | -0.00165000 |
| C | 2.91616200   | -2.90856600 | -0.12154000 |
| H | 1.14254100   | -4.21546300 | -0.16539100 |
| C | 3.19285200   | -1.54414000 | -0.06018700 |
| H | 3.68417900   | -3.67225400 | -0.15808500 |
| C | 4.51036800   | -0.93915900 | -0.04581400 |
| C | 4.72860800   | 0.48171500  | 0.07665700  |
| C | 5.67499700   | -1.70265800 | -0.14891500 |
| C | 6.06816700   | 1.04106500  | 0.09515800  |
| C | 6.97492800   | -1.16342600 | -0.13112500 |
| H | 5.59255400   | -2.77855000 | -0.25230700 |
| C | 7.23552900   | 0.20152100  | -0.01032300 |
| N | 3.76978400   | 1.40416100  | 0.18337600  |
| N | 6.08493200   | 2.37052600  | 0.21579500  |
| S | 4.51902100   | 2.86072000  | 0.29732800  |
| H | -10.68049400 | 0.61516500  | 0.19140500  |
| H | -9.87541800  | -0.00733700 | -1.25042700 |
| H | -9.22966300  | -0.64763900 | 1.67436800  |
| H | -9.95939200  | -1.75193700 | 0.50673600  |
| H | -8.78119100  | 4.70831100  | -0.80635700 |
| H | -7.39450800  | 3.93819200  | 1.11894900  |
| H | -10.13778300 | 2.57405000  | -1.08919600 |
| H | 7.80062400   | -1.85890500 | -0.21803500 |
| C | 8.53017800   | 0.83325200  | 0.01643400  |
| H | 8.50777100   | 1.91569000  | 0.11885800  |
| C | 9.79166600   | 0.31223800  | -0.06446800 |
| C | 10.08899400  | -1.07579400 | -0.20341000 |
| C | 10.93044600  | 1.27191000  | -0.00208900 |
| N | 10.31378000  | -2.21340900 | -0.31687600 |
| O | 10.81998000  | 2.47509800  | 0.11558200  |
| O | 12.12721800  | 0.64781000  | -0.09221900 |
| H | 12.80206400  | 1.35000400  | -0.04223500 |

## 2. PTZ-BTZ

|   |             |             |             |
|---|-------------|-------------|-------------|
| C | 10.70642800 | -1.42325400 | -0.95814600 |
| C | 8.73918400  | -0.22171700 | -0.19955300 |
| C | 8.20329600  | -1.42814200 | 0.28417400  |
| C | 8.90897100  | -2.61989000 | 0.11545600  |
| C | 10.16630500 | -2.62144700 | -0.49242400 |
| C | 5.86744700  | -0.01850300 | 0.45966600  |
| C | 6.63597400  | 1.05251800  | -0.03676000 |
| C | 4.58683200  | 2.27942600  | -0.48960600 |
| C | 3.81322600  | 1.21243600  | 0.00407100  |
| C | 4.48015800  | 0.05214100  | 0.43998500  |
| H | 11.68134700 | -1.40971200 | -1.43690000 |
| H | 8.47400400  | -3.54763200 | 0.47662100  |
| H | 10.71346200 | -3.55289000 | -0.60138600 |
| H | 3.88181200  | -0.78123100 | 0.79429000  |

|   |              |             |             |
|---|--------------|-------------|-------------|
| N | 2.41641300   | 1.19087500  | 0.05724900  |
| C | 1.73051800   | 2.27724300  | 0.13151600  |
| H | 2.19031900   | 3.27231000  | 0.21524000  |
| C | 0.28767000   | 2.26600800  | 0.13293900  |
| C | -0.54990100  | 3.36612000  | 0.22823400  |
| S | -0.61665400  | 0.78124500  | 0.01737800  |
| C | -1.91176400  | 3.02189400  | 0.20890400  |
| H | -0.18273900  | 4.38377300  | 0.31194500  |
| C | -2.14213600  | 1.65328600  | 0.09712200  |
| H | -2.70430600  | 3.75728300  | 0.28091400  |
| C | -3.43991800  | 1.00382300  | 0.04734600  |
| C | -3.60515700  | -0.42674600 | -0.01932300 |
| C | -4.63012900  | 1.73130200  | 0.06041500  |
| C | -4.92295200  | -1.03243800 | -0.06316700 |
| C | -5.91119700  | 1.14669100  | 0.01927800  |
| H | -4.58729400  | 2.81372700  | 0.10162800  |
| C | -6.12038100  | -0.22996800 | -0.04247600 |
| N | -2.61249800  | -1.31892300 | -0.04703300 |
| N | -4.89039900  | -2.36596000 | -0.12273000 |
| S | -3.30779000  | -2.80405900 | -0.12300600 |
| N | 8.03186900   | 0.98271900  | -0.05142400 |
| C | 9.99034900   | -0.23388400 | -0.82747500 |
| C | 5.97277000   | 2.18813700  | -0.52475100 |
| S | 6.67479500   | -1.42407300 | 1.20904900  |
| H | 8.48751200   | 1.78717800  | -0.46284000 |
| H | 10.40309200  | 0.69776900  | -1.20930300 |
| H | 6.55738100   | 3.00516500  | -0.94271000 |
| H | 4.10461900   | 3.16327300  | -0.89591800 |
| H | -6.76188500  | 1.81672700  | 0.03596900  |
| C | -7.39223700  | -0.90869900 | -0.08708900 |
| C | -8.67128500  | -0.42860700 | -0.08101300 |
| C | -9.77549900  | -1.43021800 | -0.13670200 |
| C | -9.01904700  | 0.95371800  | -0.02536300 |
| O | -9.61907700  | -2.63255400 | -0.18755300 |
| O | -10.99370600 | -0.84392200 | -0.12412700 |
| N | -9.28424700  | 2.08725400  | 0.02042600  |
| H | -7.32953000  | -1.99339800 | -0.13318700 |
| H | -11.64426500 | -1.56948500 | -0.16261400 |

### 3. COU-IND

|   |            |             |             |
|---|------------|-------------|-------------|
| C | 9.63922300 | 2.58504200  | -0.49160000 |
| C | 7.68773600 | 1.00890200  | -0.46262900 |
| C | 6.80171900 | 2.10843200  | -0.72529100 |
| C | 7.38190600 | 3.46504200  | -1.04840100 |
| C | 8.63811300 | 3.69860200  | -0.20870600 |
| C | 7.16358600 | -0.30054400 | -0.23730800 |
| C | 5.44147900 | 1.92120800  | -0.65114100 |
| C | 4.88177800 | 0.66765000  | -0.33492200 |

|   |             |             |             |
|---|-------------|-------------|-------------|
| C | 5.77140900  | -0.40862100 | -0.13196100 |
| C | 3.89357900  | -1.91647500 | 0.33540900  |
| C | 2.96536200  | -0.80202400 | 0.10903200  |
| C | 3.48988300  | 0.42947800  | -0.20991500 |
| H | 10.10105000 | 2.73707500  | -1.48048400 |
| H | 6.63395800  | 4.24460200  | -0.86756600 |
| H | 8.37409400  | 3.70243600  | 0.85600800  |
| H | 4.77511600  | 2.76201400  | -0.83051200 |
| H | 2.78881100  | 1.24447900  | -0.37059400 |
| N | 9.04498600  | 1.24664100  | -0.43688900 |
| O | 5.25234000  | -1.62844900 | 0.20505900  |
| C | 9.98959800  | 0.18036200  | -0.13570400 |
| C | 8.08662100  | -1.52561900 | -0.08815300 |
| C | 9.47865900  | -1.15411800 | -0.64396700 |
| C | 7.61217300  | -2.74254900 | -0.92231400 |
| C | 8.19448300  | -1.94101300 | 1.39784400  |
| H | 8.41040300  | -3.49509600 | -0.93931300 |
| H | 6.71649400  | -3.20839300 | -0.51358000 |
| H | 7.40727200  | -2.44975600 | -1.95870200 |
| H | 8.85428600  | -2.81203400 | 1.50084400  |
| H | 8.59726600  | -1.13414500 | 2.02039000  |
| H | 7.21255900  | -2.21231400 | 1.79475000  |
| O | 3.61595000  | -3.06159200 | 0.62766100  |
| N | 1.58682300  | -0.90547700 | 0.19734300  |
| C | 0.95626600  | -1.99470400 | 0.49242400  |
| H | 10.94044700 | 0.42569300  | -0.62448100 |
| H | 10.19004800 | 0.14396800  | 0.94786900  |
| H | 9.42900400  | -1.11203400 | -1.73985200 |
| H | 10.19522900 | -1.94217600 | -0.38407700 |
| H | 9.10193600  | 4.66458000  | -0.43692300 |
| H | 7.64765200  | 3.52545900  | -2.11497400 |
| H | 10.45291200 | 2.61878200  | 0.24452200  |
| H | 1.45824200  | -2.94119000 | 0.69961100  |
| C | -0.48672400 | -2.00066500 | 0.55610500  |
| C | -1.29707200 | -3.07974500 | 0.86962400  |
| S | -1.42622700 | -0.56423200 | 0.26140000  |
| C | -2.66706800 | -2.76289900 | 0.83368500  |
| H | -0.90353100 | -4.05919600 | 1.11973000  |
| C | -2.92729600 | -1.43469600 | 0.51112400  |
| H | -3.44846100 | -3.47813000 | 1.06461900  |
| C | -4.26985500 | -0.89160800 | 0.30235100  |
| C | -4.70654800 | 0.43771100  | 0.48099000  |
| C | -5.27978900 | -1.79134000 | -0.13601900 |
| C | -6.03753400 | 0.81380900  | 0.25504200  |
| C | -6.59242300 | -1.41871200 | -0.35726500 |
| H | -5.00074400 | -2.81856300 | -0.34081600 |
| C | -7.03208800 | -0.08453100 | -0.16849600 |
| H | -7.28683800 | -2.17456000 | -0.70050200 |
| C | -3.97153300 | 1.65128600  | 0.96395300  |

|   |              |             |             |
|---|--------------|-------------|-------------|
| C | -6.16989200  | 2.27597100  | 0.57204300  |
| N | -4.91012100  | 2.69229500  | 0.98611400  |
| O | -7.14580900  | 3.00090600  | 0.50409300  |
| O | -2.80783800  | 1.78091200  | 1.28735600  |
| C | -4.60586000  | 4.05367000  | 1.38993800  |
| H | -3.54324300  | 4.09285300  | 1.63229300  |
| H | -4.83206400  | 4.74849400  | 0.57630700  |
| H | -5.19917900  | 4.33279200  | 2.26547600  |
| C | -8.38979100  | 0.38895600  | -0.38601400 |
| C | -9.51513300  | -0.28280300 | -0.76086700 |
| C | -10.77171900 | 0.51843400  | -0.89901300 |
| C | -9.59572000  | -1.68360500 | -1.02836800 |
| N | -9.65925800  | -2.82606500 | -1.24548900 |
| O | -10.85629300 | 1.71237800  | -0.70917300 |
| O | -11.82178300 | -0.24952000 | -1.26598200 |
| H | -8.54002300  | 1.45274500  | -0.22034600 |
| H | -12.58777300 | 0.35078700  | -1.33083500 |

#### 4. PTZ-IND

|   |             |             |             |
|---|-------------|-------------|-------------|
| C | 11.18684000 | -0.67458600 | -0.49233600 |
| C | 9.03163300  | 0.05121400  | 0.35475100  |
| C | 8.54120900  | -1.25670900 | 0.19367600  |
| C | 9.36683200  | -2.24905800 | -0.33595400 |
| C | 10.69384400 | -1.96717200 | -0.66755000 |
| C | 6.08833900  | -0.10169000 | 0.53322400  |
| C | 6.82190400  | 1.09387600  | 0.66316500  |
| C | 4.75806500  | 2.35562100  | 0.42224200  |
| C | 4.02563200  | 1.16698600  | 0.25376100  |
| C | 4.71526800  | -0.05762900 | 0.32576000  |
| H | 12.21562800 | -0.43967500 | -0.74989500 |
| H | 11.33178500 | -2.75257500 | -1.06133000 |
| H | 4.14524000  | -0.97480900 | 0.21701000  |
| N | 2.64183800  | 1.09900100  | 0.05819300  |
| C | 1.99379800  | 2.06310600  | -0.49220900 |
| H | 2.48112700  | 2.96611900  | -0.88723400 |
| C | 0.55775900  | 2.02164500  | -0.64900500 |
| C | -0.24118700 | 2.98002400  | -1.24894600 |
| S | -0.37908500 | 0.66168300  | -0.10077200 |
| C | -1.60669700 | 2.63806800  | -1.23532900 |
| H | 0.15367600  | 3.89086400  | -1.68674900 |
| C | -1.86795000 | 1.40858400  | -0.64161200 |
| H | -2.38067900 | 3.25835800  | -1.67289300 |
| H | 8.96837500  | -3.25036500 | -0.47368000 |
| C | -3.21405000 | 0.87885800  | -0.40891600 |
| C | -3.61090900 | -0.47149200 | -0.34563900 |
| C | -4.26519300 | 1.81611100  | -0.22443700 |
| C | -4.94631600 | -0.83897500 | -0.13453100 |
| C | -5.58332200 | 1.45215100  | -0.01629700 |

|   |              |             |             |
|---|--------------|-------------|-------------|
| H | -4.01931100  | 2.87200400  | -0.21437000 |
| C | -5.98368600  | 0.09417300  | 0.03754000  |
| H | -6.31409300  | 2.23808200  | 0.12322000  |
| C | -2.82185000  | -1.73301800 | -0.53065500 |
| C | -5.02944300  | -2.33897000 | -0.16342900 |
| N | -3.73310800  | -2.78617400 | -0.40697000 |
| O | -5.99830300  | -3.06048600 | -0.01467500 |
| O | -1.63701200  | -1.89107500 | -0.74706900 |
| C | -3.35608900  | -4.18499100 | -0.51594300 |
| H | -2.93155900  | -4.38709100 | -1.50326000 |
| H | -2.61198700  | -4.43659600 | 0.24488900  |
| H | -4.25817900  | -4.77990200 | -0.36845100 |
| C | -7.34566900  | -0.36869400 | 0.25847100  |
| N | 8.20492400   | 1.06302900  | 0.86965900  |
| S | 6.90208400   | -1.67456700 | 0.76693600  |
| C | 10.35648700  | 0.33181900  | -0.00039400 |
| C | 6.13485600   | 2.31467400  | 0.60987300  |
| H | 6.69043400   | 3.24201800  | 0.73435600  |
| H | 4.25060200   | 3.31536700  | 0.43028000  |
| H | 10.73543600  | 1.34514800  | 0.11671000  |
| C | -8.50423100  | 0.32950200  | 0.42186400  |
| C | -8.62635800  | 1.75264700  | 0.40272600  |
| C | -9.75436800  | -0.46692900 | 0.63568500  |
| O | -9.80464200  | -1.67675800 | 0.67777700  |
| O | -10.83851900 | 0.32657200  | 0.77922100  |
| N | -8.72293000  | 2.91309900  | 0.38596400  |
| H | -11.59795300 | -0.27083000 | 0.91266000  |
| H | -7.46648600  | -1.44824900 | 0.29727300  |
| H | 8.64180400   | 1.97470500  | 0.91556000  |

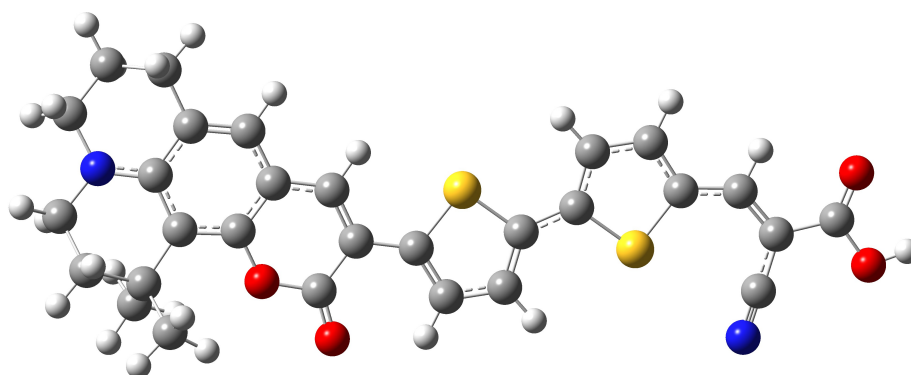

Fig. S1: Optimized structure of the test compound

Table S2: Calculated energies of HOMO, LUMO,  $\Delta_{H-L}$ ,  $\lambda_{max}$  values of the reference compound studied at different functionals.

| Functionals  | $E_{HOMO}$ (eV) | $E_{LUMO}$ (eV) | $\Delta_{H-L}$ (eV) | $\lambda_{max}$ (nm) |
|--------------|-----------------|-----------------|---------------------|----------------------|
| Experimental | -5.26           | -2.71           | 2.55                | 464                  |
| B3LYP        | -5.08           | -2.68           | 2.40                | 558                  |
| B3LYP-D3     | -5.08           | -2.68           | 2.40                | 558                  |
| CAM-B3LYP    | -6.23           | -1.59           | 4.64                | 454                  |
| MO6-2X-D3    | -6.18           | -1.92           | 4.26                | 439                  |
| PBEPBE       | -4.94           | -2.93           | 2.01                | 563                  |
| wB97XD       | -6.80           | -1.04           | 5.40                | 444                  |

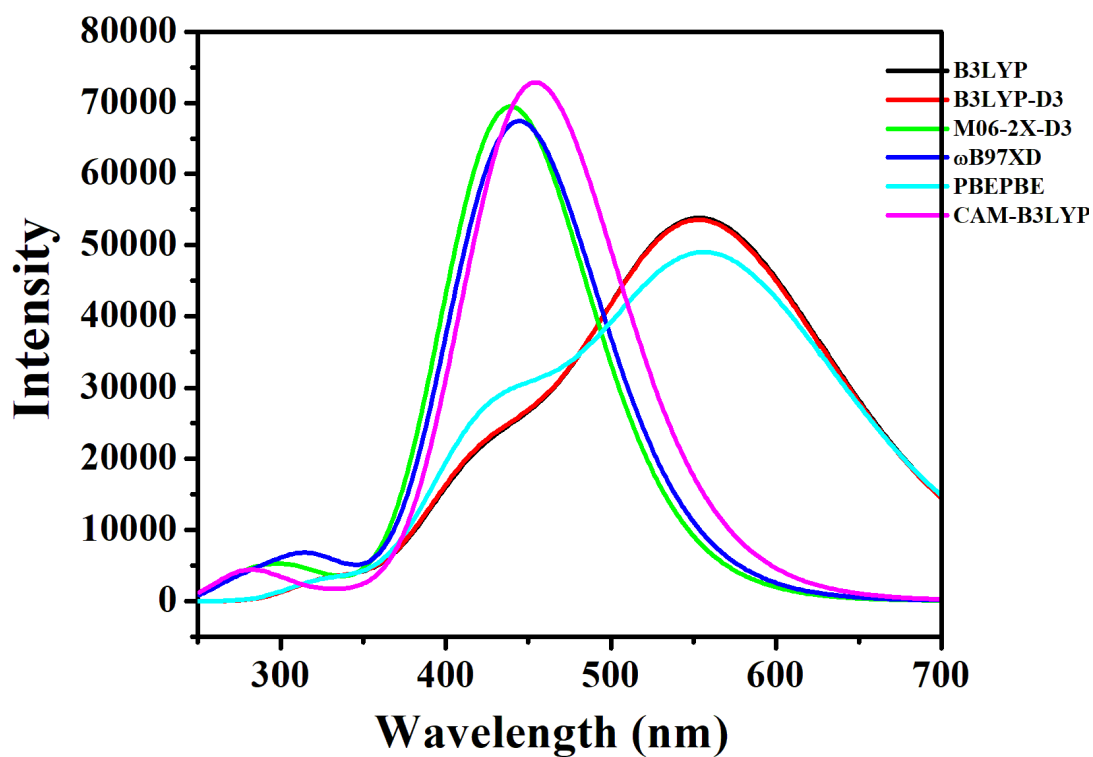

Fig. S2: Plot of uv-visible spectra of the test compound

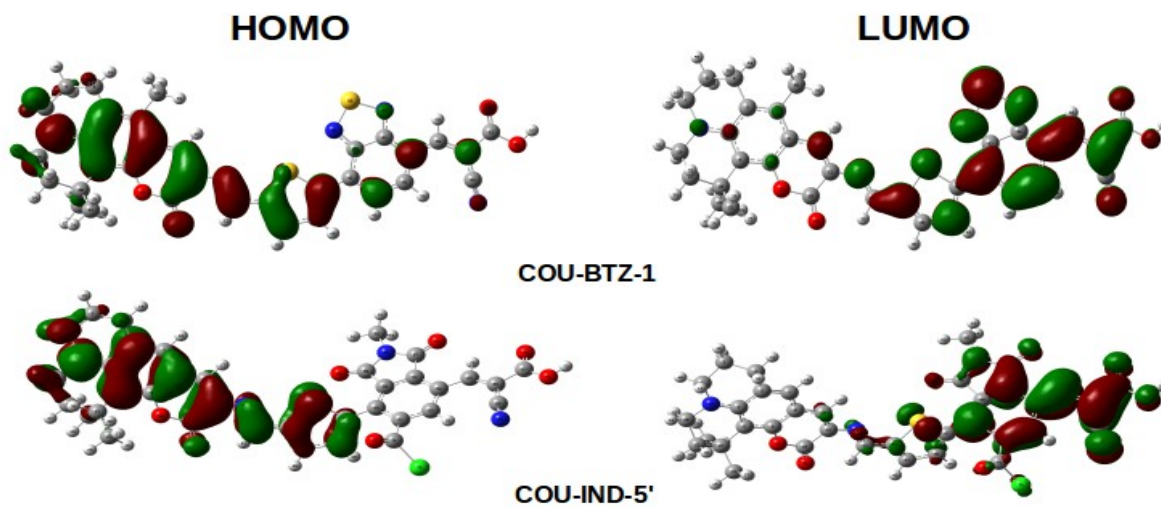

Fig. S3: Plot of frontier molecular orbitals of compounds COU-BTZ-1 and COU-IND-5'.



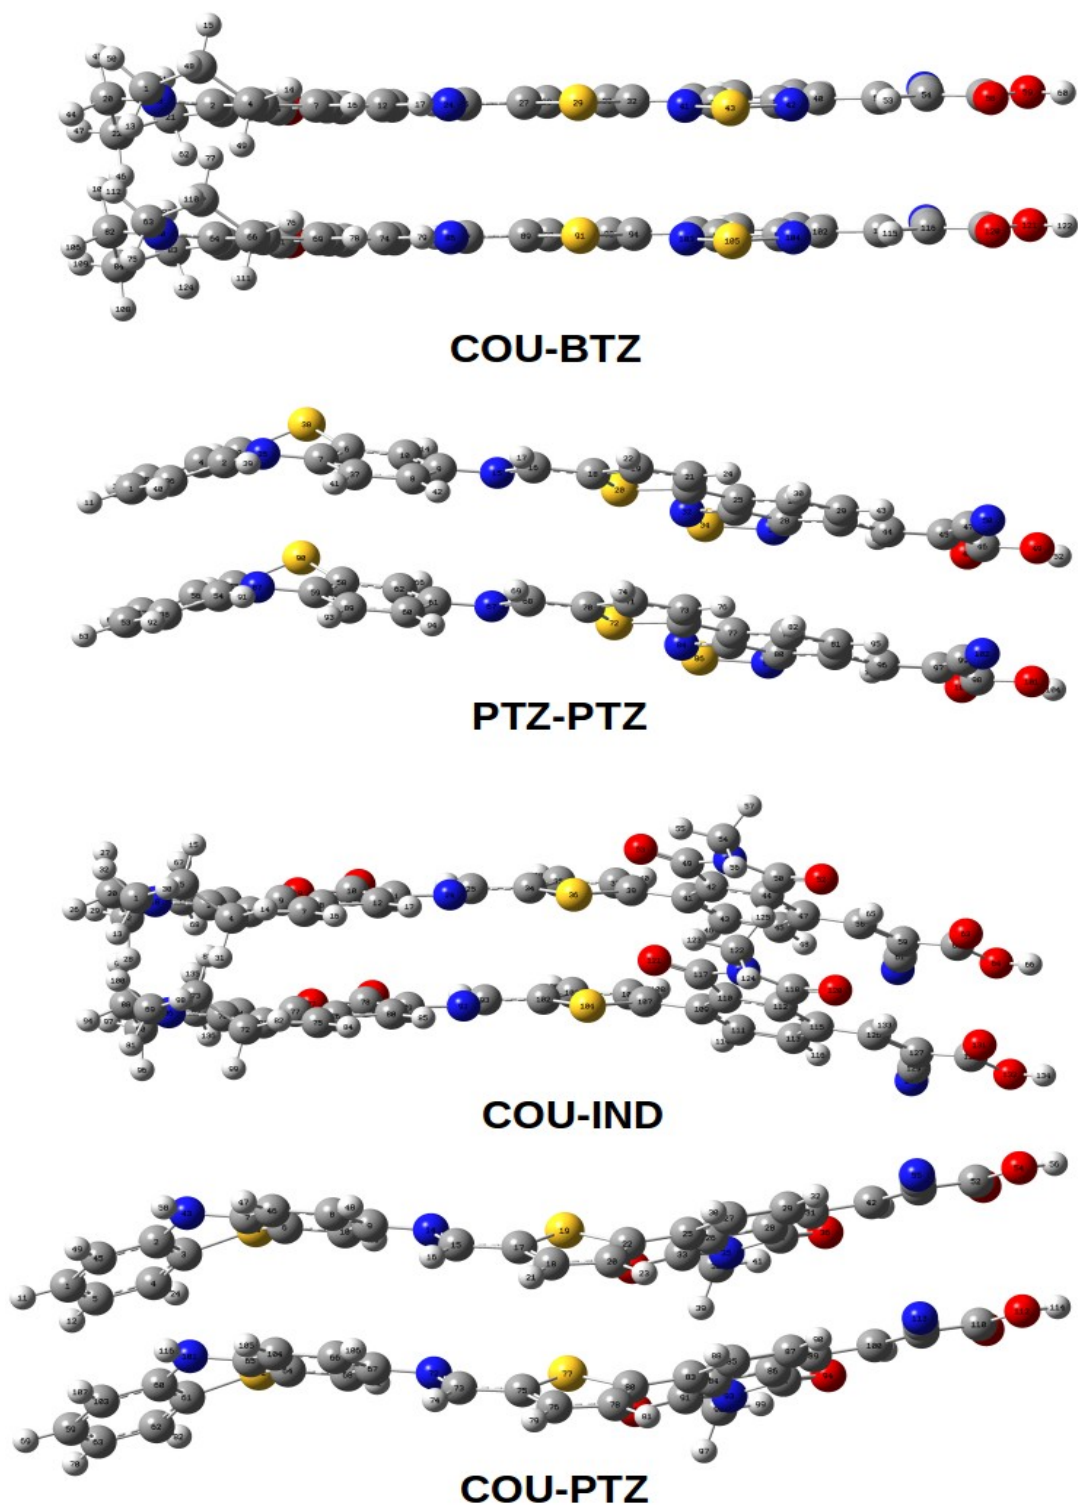

Fig. S4: Optimized structure of the stacked unsubstituted compound .

Table S3: Spectral data obtained from PDOS spectra.

| Compound   | Groups                                  | Contribution to HOMO(%) | Contribution to LUMO(%) |
|------------|-----------------------------------------|-------------------------|-------------------------|
| COU-BTZ    | Acceptor and Donor unit                 | 76                      | 53                      |
|            | Bridging unit and Anchoring group       | 24                      | 44                      |
|            | Ti <sub>5</sub> O <sub>10</sub> cluster | 0                       | 3                       |
| COU-BTZ-1  | Acceptor and Donor unit                 | 77                      | 53                      |
|            | Bridging unit and Anchoring group       | 23                      | 44                      |
|            | Ti <sub>5</sub> O <sub>10</sub> cluster | 0                       | 3                       |
| COU-BTZ-2  | Acceptor and Donor unit                 | 69                      | 54                      |
|            | Bridging unit and Anchoring group       | 31                      | 44                      |
|            | Ti <sub>5</sub> O <sub>10</sub> cluster | 0                       | 2                       |
| COU-BTZ-3  | Acceptor and Donor unit                 | 76                      | 54                      |
|            | Bridging unit and Anchoring group       | 24                      | 44                      |
|            | Ti <sub>5</sub> O <sub>10</sub> cluster | 0                       | 2                       |
| COU-BTZ-4' | Acceptor and Donor unit                 | 79                      | 56                      |
|            | Bridging unit and Anchoring group       | 21                      | 41                      |
|            | Ti <sub>5</sub> O <sub>10</sub> cluster | 0                       | 2                       |
| COU-BTZ-5' | Acceptor and Donor unit                 | 79                      | 58                      |
|            | Bridging unit and Anchoring group       | 21                      | 40                      |
|            | Ti <sub>5</sub> O <sub>10</sub> cluster | 0                       | 2                       |
| COU-BTZ-6' | Acceptor and Donor unit                 | 76                      | 52                      |
|            | Bridging unit and Anchoring group       | 24                      | 46                      |
|            | Ti <sub>5</sub> O <sub>10</sub> cluster | 0                       | 2                       |
| COU-BTZ-7' | Acceptor and Donor unit                 | 79                      | 58                      |
|            | Bridging unit and Anchoring group       | 21                      | 41                      |
|            | Ti <sub>5</sub> O <sub>10</sub> cluster | 0                       | 2                       |
| PTZ-BTZ    | Acceptor and Donor unit                 | 90                      | 53                      |
|            | Bridging unit and Anchoring group       | 10                      | 45                      |
|            | Ti <sub>5</sub> O <sub>10</sub> cluster | 0                       | 2                       |
| PTZ-BTZ-1  | Acceptor and Donor unit                 | 90                      | 53                      |
|            | Bridging unit and Anchoring group       | 10                      | 45                      |
|            | Ti <sub>5</sub> O <sub>10</sub> cluster | 0                       | 2                       |
| PTZ-BTZ-2  | Acceptor and Donor unit                 | 92                      | 53                      |
|            | Bridging unit and Anchoring group       | 8                       | 45                      |
|            | Ti <sub>5</sub> O <sub>10</sub> cluster | 0                       | 2                       |
| PTZ-BTZ-3  | Acceptor and Donor unit                 | 91                      | 53                      |
|            | Bridging unit and Anchoring group       | 9                       | 45                      |
|            | Ti <sub>5</sub> O <sub>10</sub> cluster | 0                       | 2                       |
| PTZ-BTZ-4' | Acceptor and Donor unit                 | 91                      | 57                      |
|            | Bridging unit and Anchoring group       | 9                       | 41                      |
|            | Ti <sub>5</sub> O <sub>10</sub> cluster | 0                       | 2                       |
| PTZ-BTZ-5' | Acceptor and Donor unit                 | 91                      | 58                      |
|            | Bridging unit and Anchoring group       | 9                       | 40                      |
|            | Ti <sub>5</sub> O <sub>10</sub> cluster | 0                       | 2                       |

|            |                                                                                                         |               |               |
|------------|---------------------------------------------------------------------------------------------------------|---------------|---------------|
| PTZ-BTZ-6' | Acceptor and Donor unit<br>Bridging unit and Anchoring group<br>Ti <sub>5</sub> O <sub>10</sub> cluster | 90<br>10<br>0 | 52<br>46<br>2 |
| PTZ-BTZ-7' | Acceptor and Donor unit<br>Bridging unit and Anchoring group<br>Ti <sub>5</sub> O <sub>10</sub> cluster | 91<br>9<br>0  | 58<br>40<br>2 |
| COU-IND    | Acceptor and Donor unit<br>Bridging unit and Anchoring group<br>Ti <sub>5</sub> O <sub>10</sub> cluster | 79<br>21<br>0 | 36<br>57<br>7 |
| COU-IND-1  | Acceptor and Donor unit<br>Bridging unit and Anchoring group<br>Ti <sub>5</sub> O <sub>10</sub> cluster | 79<br>21<br>0 | 36<br>57<br>7 |
| COU-IND-2  | Acceptor and Donor unit<br>Bridging unit and Anchoring group<br>Ti <sub>5</sub> O <sub>10</sub> cluster | 78<br>22<br>0 | 36<br>57<br>7 |
| COU-IND-3  | Acceptor and Donor unit<br>Bridging unit and Anchoring group<br>Ti <sub>5</sub> O <sub>10</sub> cluster | 79<br>21<br>0 | 36<br>57<br>7 |
| COU-IND-4' | Acceptor and Donor unit<br>Bridging unit and Anchoring group<br>Ti <sub>5</sub> O <sub>10</sub> cluster | 80<br>20<br>0 | 39<br>55<br>6 |
| COU-IND-5' | Acceptor and Donor unit<br>Bridging unit and Anchoring group<br>Ti <sub>5</sub> O <sub>10</sub> cluster | 80<br>20<br>0 | 41<br>54<br>5 |
| COU-IND-6' | Acceptor and Donor unit<br>Bridging unit and Anchoring group<br>Ti <sub>5</sub> O <sub>10</sub> cluster | 79<br>21<br>0 | 35<br>59<br>6 |
| COU-IND-7' | Acceptor and Donor unit<br>Bridging unit and Anchoring group<br>Ti <sub>5</sub> O <sub>10</sub> cluster | 80<br>20<br>0 | 40<br>55<br>5 |
| PTZ-IND    | Acceptor and Donor unit<br>Bridging unit and Anchoring group<br>Ti <sub>5</sub> O <sub>10</sub> cluster | 91<br>9<br>0  | 36<br>59<br>5 |
| PTZ-IND-1  | Acceptor and Donor unit<br>Bridging unit and Anchoring group<br>Ti <sub>5</sub> O <sub>10</sub> cluster | 91<br>9<br>0  | 36<br>59<br>5 |
| PTZ-IND-2  | Acceptor and Donor unit<br>Bridging unit and Anchoring group<br>Ti <sub>5</sub> O <sub>10</sub> cluster | 93<br>7<br>0  | 36<br>58<br>6 |
| PTZ-IND-3  | Acceptor and Donor unit<br>Bridging unit and Anchoring group<br>Ti <sub>5</sub> O <sub>10</sub> cluster | 91<br>9<br>0  | 36<br>59<br>5 |
| PTZ-IND-4' | Acceptor and Donor unit<br>Bridging unit and Anchoring group<br>Ti <sub>5</sub> O <sub>10</sub> cluster | 91<br>9<br>0  | 40<br>55<br>5 |
| PTZ-IND-5' | Acceptor and Donor unit                                                                                 | 90            | 36            |

|            |                                                                                                         |              |               |
|------------|---------------------------------------------------------------------------------------------------------|--------------|---------------|
|            | Bridging unit and Anchoring group<br>Ti <sub>5</sub> O <sub>10</sub> cluster                            | 10<br>0      | 59<br>5       |
| PTZ-IND-6' | Acceptor and Donor unit<br>Bridging unit and Anchoring group<br>Ti <sub>5</sub> O <sub>10</sub> cluster | 91<br>9<br>0 | 35<br>60<br>5 |
| PTZ-IND-7' | Acceptor and Donor unit<br>Bridging unit and Anchoring group<br>Ti <sub>5</sub> O <sub>10</sub> cluster | 91<br>9<br>0 | 41<br>55<br>4 |
